# Supplementary material
Source: PubMed Central journal article supplement (PMC7606694)
Supplement: supp_RA120.014906_161639_1_supp_587632_qf2ptr.pdf [file supp_RA120.014906_161639_1_supp_587632_qf2ptr.pdf]

## Supporting information

### The genetic Ca<sup>2+</sup> sensor GCaMP3 reveals multiple Ca<sup>2+</sup> stores differentially coupled to Ca<sup>2+</sup> entry in the human malaria parasite *Plasmodium falciparum*

Lucas Borges-Pereira<sup>1,2#</sup>, Samantha J. Thomas<sup>2#</sup>, Amanda Laizy dos Anjos e Silva<sup>1</sup>, Paula J. Bartlett<sup>2</sup>; Andrew P. Thomas<sup>2</sup> \* and Célia R. S. Garcia<sup>1,3\*</sup>

<sup>1</sup>Departamento de Fisiologia, Instituto de Biociências, Universidade de São Paulo, Brasil.

<sup>2</sup>Department of Pharmacology, Physiology and Neuroscience, Rutgers University, New Jersey Medical School, Newark, New Jersey, USA. <sup>3</sup>Departamento de Análises Clínicas e Toxicológicas, Faculdade de Ciências Farmacêuticas, Universidade de São Paulo, Brasil

#These authors contributed equally to this work.

\*Corresponding authors:

Célia R. S. Garcia: [cgarcia@usp.br](mailto:cgarcia@usp.br)

Andrew Thomas : [thomasap@njms.rutgers.edu](mailto:thomasap@njms.rutgers.edu)

**Running title:** GCaMP3 studies of Ca<sup>2+</sup> pools in *P. falciparum*

**Keywords:** Malaria, Calcium, *Plasmodium*, Thapsigargin, SOCE, GCaMP3, Signaling

#### List of the material included:

**Figure S.1** Thg causes an addition artefact when added in the spectrofluorometer cuvette

**Figure S.2** Cell population average of single cell [Ca<sup>2+</sup>]<sub>c</sub> responses to Thg.

**Figure S.3** Removal of extracellular Ca<sup>2+</sup> reduces [Ca<sup>2+</sup>]<sub>c</sub> to a new steady state in isolated *P. falciparum*.

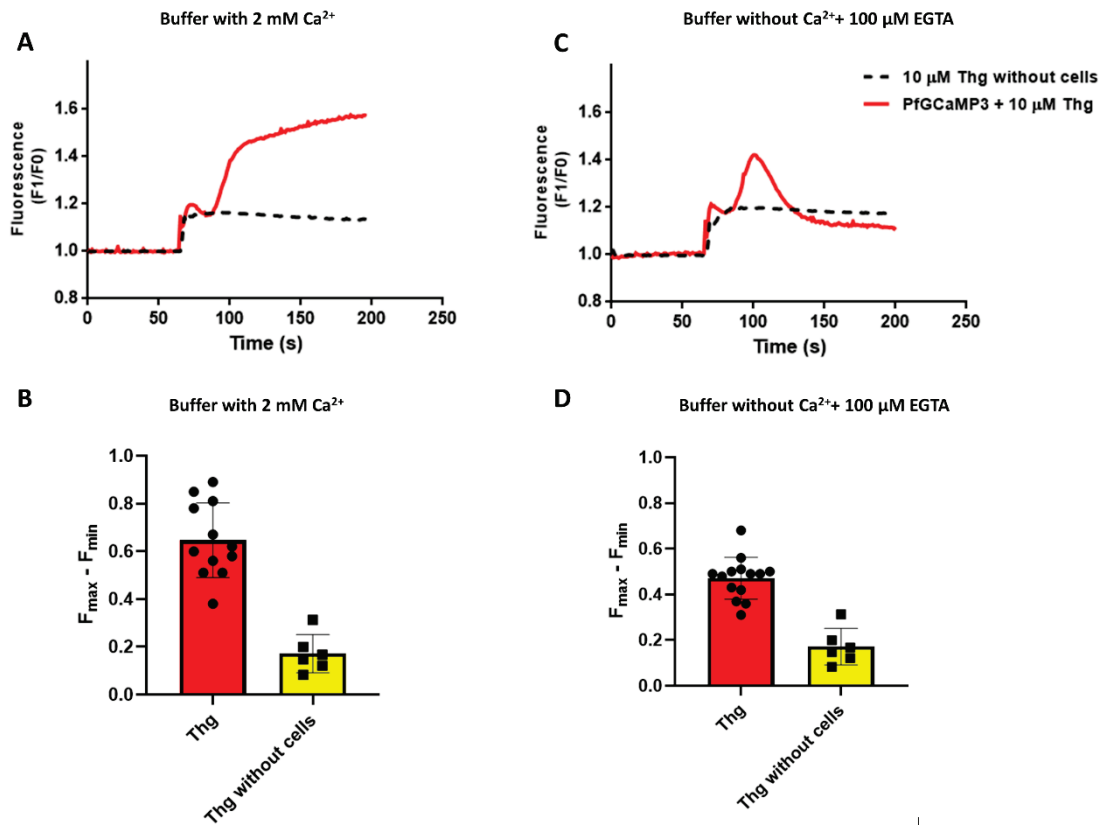

**Fig. S1** Thg causes an addition artefact when added in the spectrofluorometer cuvette. Ten μM Thg was added in the spectrofluorometer cuvette in the absence of PfGCaMP3 parasites (buffer only). Thg *per se* showed a fluorescence artefact (dotted lines). This artefact was compared with the Ca<sup>2+</sup> response elicited by Thg in PfGCaMP3 parasites (red lines) in the presence (A-B) and absence (C-D) of extracellular Ca<sup>2+</sup>.

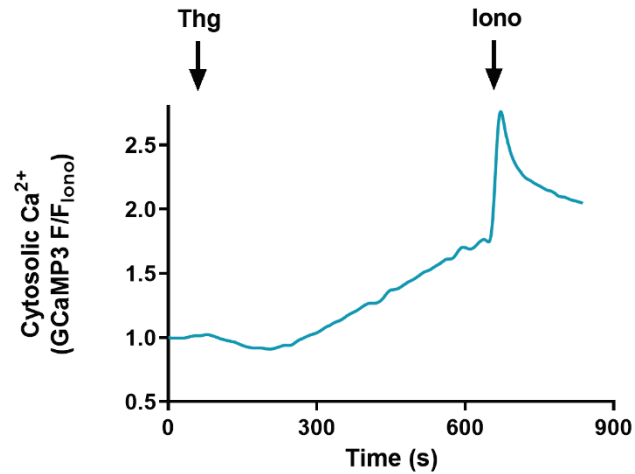

**Fig. S2 Cell population average of single cell  $[Ca^{2+}]_c$  responses to Thg.**

Averaged  $[Ca^{2+}]_c$  trace from 43 single trophozoite-stage *P. falciparum* parasites expressing GCaMP3 (PFGCaMP3). Cells were challenged with 5  $\mu$ M Thg in the presence of extracellular  $Ca^{2+}$  (2 mM), followed by 10  $\mu$ M Ionomycin (Iono). Responses in individual cells comprise complex oscillatory changes in  $[Ca^{2+}]_c$  (see Fig. 4 C and F), whereas the population average is similar to fluorimeter cell population experiments (Figs. 1-3), albeit with a longer delay before the response, presumably because there is no mixing of drugs in the imaging experiments.

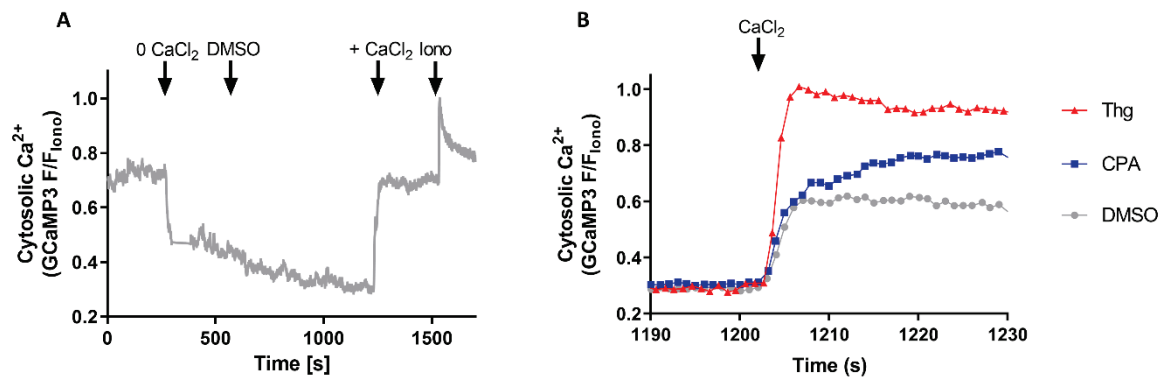

**Fig. S3 Removal of extracellular  $Ca^{2+}$  reduces  $[Ca^{2+}]_c$  to a new steady state in isolated *P. falciparum*.** (A) Representative DMSO vehicle control trace to show the change in  $[Ca^{2+}]_c$  upon removal and add back of extracellular  $Ca^{2+}$  in trophozoite-stage PfGCaMP3 parasites. Ionomycin ( $10 \mu M$ , Iono) was added at the end of each experiment. (B) Representative traces of the rise in  $[Ca^{2+}]_c$  following addback of  $2 \text{ mM } Ca^{2+}$  after removal of extracellular  $Ca^{2+}$  and 10 min treatment with DMSO vehicle,  $10 \mu M$  CPA or  $5 \mu M$  Thg). The extracellular  $Ca^{2+}$  washout period shown in the first 400 s of panel A was omitted for the traces in Figure 4. Following addback of  $2 \text{ mM } CaCl_2$ ,  $[Ca^{2+}]_c$  returned to basal levels in DMSO- and CPA-treated parasites. By contrast, Thg-treated parasites showed a larger amplitude and faster rate of  $[Ca^{2+}]_c$  rise, consistent with SOCE. All data are representative of 3 independent experiments and responses were normalized to the peak ionomycin ( $10 \mu M$ , Iono) response ( $F/F_{Iono}$ ).
